# Supplementary material for: Anthraquinone laxative-altered gut microbiota induces colonic mucosal barrier dysfunction for colorectal cancer progression
Source: Research Square preprint supplement (doi:10.21203/rs.3.rs-72368/v2), 2020-10-20
Supplement: Supplementary file 1 [file 3c7ec0388aa59e3320c6007b.xlsx]

## Sheet: TOP 50 Differential metabolite
group	Ctrl	Ctrl	Ctrl	Ctrl	Ctrl	Ctrl	Ctrl	Ctrl	Sennoside A	Sennoside A	Sennoside A	Sennoside A	Sennoside A	Sennoside A	Sennoside A	Sennoside A	Sennoside A
2-8-dihydroxyquinoline	46700000	35500000	45500000	53300000	69200000	131000000	17300000	19300000	1360933	3193256	4836817	4868738	404982	21900000	25600000	850112	876306
2-hydroxyquinoline	3485045	2793818	2931773	5586477	6794249	5354257	1131968	1176547	246697	574054	67397.6	449392	685164	910102	983246	48356.2	159188
3-4-dihydroxybenzoic acid	11600000	11200000	18200000	19000000	19700000	26500000	5145865	7168008	579514	3605892	2072636	2618668	828563	2762921	2496452	111904	62173
3-5-dihydroxyphenylglycine	1810356	1940738	2198268	2299747	3172949	2787572	318270	1143723	167092	350886	547895	329531	345240	971075	803756	98082.4	81444.8
3-hydroxy-3-methylglutaric acid	3123194	1369578	2504238	10900000	7589040	7615789	8245517	4733597	121575	532887	1910854	253035	107184	291519	53609.1	156138	133616
3-hydroxypropionic acid	10600000	14300000	30800000	31100000	22000000	18200000	2190717	1910158	763890	1920470	1622996	1238921	931655	1077864	983596	1243744	646505
3-hydroxypyridine	2704136	2503248	2961882	3185076	4704000	2887617	1994096	3103647	820327	2321028	1976608	664083	1512117	1592289	1019438	770724	575544
5-alpha-cholestan-3-beta-ol	10200000	2081042	2379582	1207530	16100000	7120605	4932949	8464037	415287	934700	1416909	645823	834426	1683841	1235188	542110	577603
5-aminovaleric acid lactame	945184	1745883	2231728	2262870	2281111	1263250	965709	945521	284234	522185	450138	692694	304887	834772	775281	292141	224634
6-deoxy-D-glucose	561000000	316000000	275000000	242000000	1110000000	867000000	389000000	732000000	69200000	597000000	416000000	272000000	103000000	316000000	335000000	133000000	86200000
alpha tocopherol	67400000	13900000	8321057	2382301	101000000	45200000	37100000	45600000	4195488	20200000	2215646	2513823	8626520	26300000	20400000	7033233	4727746
alpha-ketoglutarate	25700000	66400000	76900000	47400000	104000000	78800000	10100000	10200000	727239	1838393	6518876	3306877	2844654	3636900	4763670	205446	404147
arabitol	36800000	24000000	8874791	40100000	100000000	63800000	15000000	12200000	293102	850757	7472488	1088952	823732	5819266	476433	183919	301820
aspartate	35900000	84000000	73300000	29900000	118000000	31700000	34900000	38400000	17500000	35900000	35600000	29600000	16200000	33700000	13600000	12600000	23900000
beta-alanine	15900000	14100000	29500000	28900000	48300000	35500000	10600000	20900000	2917119	17100000	26100000	8438565	4326725	10600000	8554999	5381756	2120160
beta-glutamic acid	60100000	34800000	68500000	90100000	66000000	77800000	13200000	11500000	7853964	16900000	19800000	23600000	1379559	14400000	10700000	6023127	6084669
beta-hydroxybutyric acid	10400000	20800000	15200000	16700000	38800000	27200000	9208051	10600000	7375611	8534284	11400000	6896173	4029934	9538869	1683615	3647670	2765302
cellobiose	2893058	1320150	1836421	7228942	2113319	3093135	1181773	1170596	127420	523074	1943507	1571414	239799	2227115	727705	48888.9	45736
cholesterol	25300000	16100000	9086182	6930321	61400000	21000000	13600000	33400000	4816786	13300000	13700000	6523013	6830741	15500000	5488370	5384014	7378457
galacturonic acid	160000000	19000000	161000000	106000000	381000000	265000000	119000000	133000000	2611440	8466766	101000000	6920361	10300000	16000000	37200000	3239428	5651212
glucoheptonic acid	18000000	22200000	16300000	40100000	26400000	28000000	9385479	25600000	5925245	12200000	5344022	6680508	289429	9276689	6082717	4174542	5188194
glucuronic acid	160000000	170000000	161000000	106000000	381000000	265000000	119000000	133000000	2753164	8181830	100000000	5532130	7454631	53600000	37200000	3239428	5605309
glutamic acid	71100000	133000000	144000000	91700000	259000000	91400000	54600000	121000000	7982863	51200000	1462410	30400000	17000000	23200000	15200000	21400000	13800000
glutaric acid	68200000	9053459	10300000	13100000	90400000	11300000	44000000	10600000	1588522	6942051	13600000	17200000	1889151	2510508	10800000	979206	1128257
glycerol-1-phosphate	24100000	18600000	21600000	24700000	37700000	42800000	6147076	11200000	3492024	9527900	8277292	7747439	5863602	7618090	6066886	1924991	1778715
guanine	21500000	26300000	24700000	6500773	20300000	18900000	9093703	5781355	690270	7980927	14500000	8204461	2775119	4451154	5201655	1038920	1700496
hydrocinnamic acid	9167270	21100000	10100000	18000000	28600000	21900000	8046293	11200000	1713897	1509538	5093409	12800000	3620328	5722845	4053909	1504114	859789
hypoxanthine	267000000	263000000	458000000	487000000	534000000	685000000	109000000	171000000	5820963	17000000	34200000	52300000	14800000	58100000	46600000	142052	1272524
inosine	148720420	149923910	124497391	43267215	175510972	100810580	2.66645e+07	23733278	1.23954e+07	3.44627e+07	123629289	57591884	3.55501e+07	2.67628e+07	3.96158e+07	2.46292e+07	14887915
lactose	58400000	34500000	76500000	114000000	64700000	90100000	10500000	62600000	9032917	74100000	13600000	23100000	60900000	25000000	8837704	5570283	4897320
methanolphosphate	61600000	115000000	100000000	78900000	312000000	135000000	24100000	114000000	10700000	7869046	12600000	8683815	12800000	41500000	17600000	1467244	3494284
myo-inositol	92900000	99800000	343000000	117000000	165000000	171000000	63800000	98800000	22700000	161000000	115000000	31600000	20100000	83000000	58500000	40900000	48200000
N-acetyl-D-galactosamine	196000000	218000000	358000000	221000000	302000000	340000000	190000000	159000000	34000000	96500000	199000000	103000000	63600000	158000000	138000000	31000000	20000000
nicotinic acid	29400000	40200000	59700000	59200000	66700000	69200000	14100000	20200000	2926159	8933906	15700000	5582932	5382303	8985170	8239940	2522244	1809527
N-methylalanine	292000000	421000000	351000000	301000000	535000000	465000000	69100000	108000000	17000000	87500000	121000000	57900000	22900000	57200000	44900000	17500000	20400000
oxoproline	343000000	324000000	460000000	327000000	715000000	503000000	141000000	298000000	112000000	269000000	584000000	294000000	67800000	119000000	73000000	92700000	66100000
pantothenic acid	18900000	27200000	41300000	35000000	45200000	36400000	12300000	14500000	2088865	9847399	14400000	14600000	3255396	10200000	7386644	2069424	4793400
phosphate	638000000	866000000	781000000	629000000	1090000000	925000000	655000000	491000000	85800000	110000000	196000000	79400000	212000000	279000000	132000000	32300000	53700000
phosphogluconic acid	13700000	10700000	14500000	8634129	23100000	17000000	3248748	7668654	1014400	1479973	6169313	1590783	2496277	4253216	1399308	651006	389954
ribose	390000000	508000000	726000000	423000000	675000000	633000000	218000000	316000000	93300000	147000000	172000000	190000000	183000000	356000000	483000000	52900000	32400000
serine minor	10700000	25400000	16400000	4711920	24900000	9539064	3910914	8691716	4059445	8929919	7087801	6626502	3403159	3789191	2956548	3289248	2100884
stearic acid	654619	471253	1347918	1123660	1374257	1228011	443040	368833	199225	681431	573297	357955	126131	414774	134375	152876	323072
sucrose	9503868	15400000	12000000	7488457	14300000	11200000	10700000	23700000	16800000	52600000	45500000	36300000	22000000	14100000	6292402	19900000	22600000
sulfuric acid	11000000	72800000	63800000	46800000	84600000	73200000	9387614	11900000	10100000	9007734	3564885	15500000	16800000	10000000	17800000	4085649	8644920
tagatose	263527230	313775260	281859100	398753850	629319200	368670110	72646110	304656990	69750010	146264480	344331400	96689990	32258920	47643990	35642950	118515190	39439030
thymine	263000000	277000000	452000000	540000000	569000000	647000000	172000000	193000000	8982845	14300000	32200000	11800000	16300000	81300000	41300000	5431293	3607140
uracil	16900000	226000000	764000000	754000000	846000000	175000000	72600000	356000000	28100000	40600000	4558373	58400000	9852530	207000000	154000000	10500000	6221176
uric acid	20500000	21100000	19600000	17600000	50300000	26400000	8055641	16700000	1287739	4912373	25200000	11600000	2596677	23400000	14300000	57361.7	484386
xanthine	423000000	393000000	587000000	592000000	703000000	714000000	191000000	252000000	13200000	22200000	45900000	57100000	36300000	150000000	121000000	1104838	2309090
xanthosine	4964253	10800000	7470445	5481600	11400000	6935390	845945	1098882	235628	659902	1814223	1279572	430376	760701	793146	83452.5	103018

## Sheet: enrichment pathway and 
pathways	group	Ctrl	Ctrl	Ctrl	Ctrl	Ctrl	Ctrl	Ctrl	Ctrl	Sennoside A	Sennoside A	Sennoside A	Sennoside A	Sennoside A	Sennoside A	Sennoside A	Sennoside A	Sennoside A
Purine metabolism	guanine	21500000	26300000	24700000	6500773	20300000	18900000	9093703	5781355	690270	7980927	14500000	8204461	2775119	4451154	5201655	1038920	1700496
	hypoxanthine	267000000	263000000	458000000	487000000	534000000	685000000	109000000	171000000	5820963	17000000	34200000	52300000	14800000	58100000	46600000	142052	1272524
	inosine	148720420	149923910	124497391	43267215	175510972	100810580	2.66645e+07	23733278	1.23954e+07	3.44627e+07	123629289	57591884	3.55501e+07	2.67628e+07	3.96158e+07	2.46292e+07	14887915
	xanthine	423000000	393000000	587000000	592000000	703000000	714000000	191000000	252000000	13200000	22200000	45900000	57100000	36300000	150000000	121000000	1104838	2309090
	xanthosine	4964253	10800000	7470445	5481600	11400000	6935390	845945	1098882	235628	659902	1814223	1279572	430376	760701	793146	83452.5	103018
	sulfuric acid	11000000	72800000	63800000	46800000	84600000	73200000	9387614	11900000	10100000	9007734	3564885	15500000	16800000	10000000	17800000	4085649	8644920
	uric acid	20500000	21100000	19600000	17600000	50300000	26400000	8055641	16700000	1287739	4912373	25200000	11600000	2596677	23400000	14300000	57361.7	484386
Pantothenate and CoA biosynthesis	beta-alanine	15900000	14100000	29500000	28900000	48300000	35500000	10600000	20900000	2917119	17100000	26100000	8438565	4326725	10600000	8554999	5381756	2120160
	uracil	16900000	226000000	764000000	754000000	846000000	175000000	72600000	356000000	28100000	40600000	4558373	58400000	9852530	207000000	154000000	10500000	6221176
	pantothenic acid	18900000	27200000	41300000	35000000	45200000	36400000	12300000	14500000	2088865	9847399	14400000	14600000	3255396	10200000	7386644	2069424	4793400
	aspartate	35900000	84000000	73300000	29900000	118000000	31700000	34900000	38400000	17500000	35900000	35600000	29600000	16200000	33700000	13600000	12600000	23900000
beta-Alanine metabolism	beta-alanine	15900000	14100000	29500000	28900000	48300000	35500000	10600000	20900000	2917119	17100000	26100000	8438565	4326725	10600000	8554999	5381756	2120160
	uracil	16900000	226000000	764000000	754000000	846000000	175000000	72600000	356000000	28100000	40600000	4558373	58400000	9852530	207000000	154000000	10500000	6221176
	aspartate	35900000	84000000	73300000	29900000	118000000	31700000	34900000	38400000	17500000	35900000	35600000	29600000	16200000	33700000	13600000	12600000	23900000
	3-hydroxypropionic acid	10600000	14300000	30800000	31100000	22000000	18200000	2190717	1910158	763890	1920470	1622996	1238921	931655	1077864	983596	1243744	646505
Arginine biosynthesis	glutamic acid	71100000	133000000	144000000	91700000	259000000	91400000	54600000	121000000	7982863	51200000	1462410	30400000	17000000	23200000	15200000	21400000	13800000
	aspartate	35900000	84000000	73300000	29900000	118000000	31700000	34900000	38400000	17500000	35900000	35600000	29600000	16200000	33700000	13600000	12600000	23900000
	glutaric acid	68200000	9053459	10300000	13100000	90400000	11300000	44000000	10600000	1588522	6942051	13600000	17200000	1889151	2510508	10800000	979206	1128257
Butanoate metabolism	glutamic acid	71100000	133000000	144000000	91700000	259000000	91400000	54600000	121000000	7982863	51200000	1462410	30400000	17000000	23200000	15200000	21400000	13800000
	beta-hydroxybutyric acid	10400000	20800000	15200000	16700000	38800000	27200000	9208051	10600000	7375611	8534284	11400000	6896173	4029934	9538869	1683615	3647670	2765302
	glutaric acid	68200000	9053459	10300000	13100000	90400000	11300000	44000000	10600000	1588522	6942051	13600000	17200000	1889151	2510508	10800000	979206	1128257
D−Glutamine and D−glutamate metabolism	glutamic acid	71100000	133000000	144000000	91700000	259000000	91400000	54600000	121000000	7982863	51200000	1462410	30400000	17000000	23200000	15200000	21400000	13800000
	glutaric acid	68200000	9053459	10300000	13100000	90400000	11300000	44000000	10600000	1588522	6942051	13600000	17200000	1889151	2510508	10800000	979206	1128257
Ascorbate and aldarate metabolism	glucuronic acid	160000000	170000000	161000000	106000000	381000000	265000000	119000000	133000000	2753164	8181830	100000000	5532130	7454631	53600000	37200000	3239428	5605309
	myo-inositol	92900000	99800000	343000000	117000000	165000000	171000000	63800000	98800000	22700000	161000000	115000000	31600000	20100000	83000000	58500000	40900000	48200000
Galactose metabolism	lactose	58400000	34500000	76500000	114000000	64700000	90100000	10500000	62600000	9032917	74100000	13600000	23100000	60900000	25000000	8837704	5570283	4897320
	myo-inositol	92900000	99800000	343000000	117000000	165000000	171000000	63800000	98800000	22700000	161000000	115000000	31600000	20100000	83000000	58500000	40900000	48200000
	sucrose	9503868	15400000	12000000	7488457	14300000	11200000	10700000	23700000	16800000	52600000	45500000	36300000	22000000	14100000	6292402	19900000	22600000
Alanine, aspartate and glutamate metabolism	aspartate	35900000	84000000	73300000	29900000	118000000	31700000	34900000	38400000	17500000	35900000	35600000	29600000	16200000	33700000	13600000	12600000	23900000
	glutamic acid	71100000	133000000	144000000	91700000	259000000	91400000	54600000	121000000	7982863	51200000	1462410	30400000	17000000	23200000	15200000	21400000	13800000
	glutaric acid	68200000	9053459	10300000	13100000	90400000	11300000	44000000	10600000	1588522	6942051	13600000	17200000	1889151	2510508	10800000	979206	1128257
